# Supplementary material for: Atomic-Scale Structural and Magnetic Coupling Properties of Twin Boundaries in LiFe5O8 Film
Source: Preprints.org preprint supplement (doi:10.20944/preprints202406.1300.v1), 2024-06-19
Supplement: Supplementary file 1 [file supplementary]

Supplementary Material

Atomic-Scale Structural and Magnetic Coupling Properties of Twin Boundaries in LiFe5O8 film

Kun Liu *, Jiankang Li and Songyou Zhang

School of Electronics and Information Engineering, Suzhou Vocational University, Suzhou 215104, China; ljk@jssvc.edu.cn (J.L.); 92207@jssvc.edu.cn (S.Z.)

***** Correspondence: 92107@jssvc.edu.cn

| 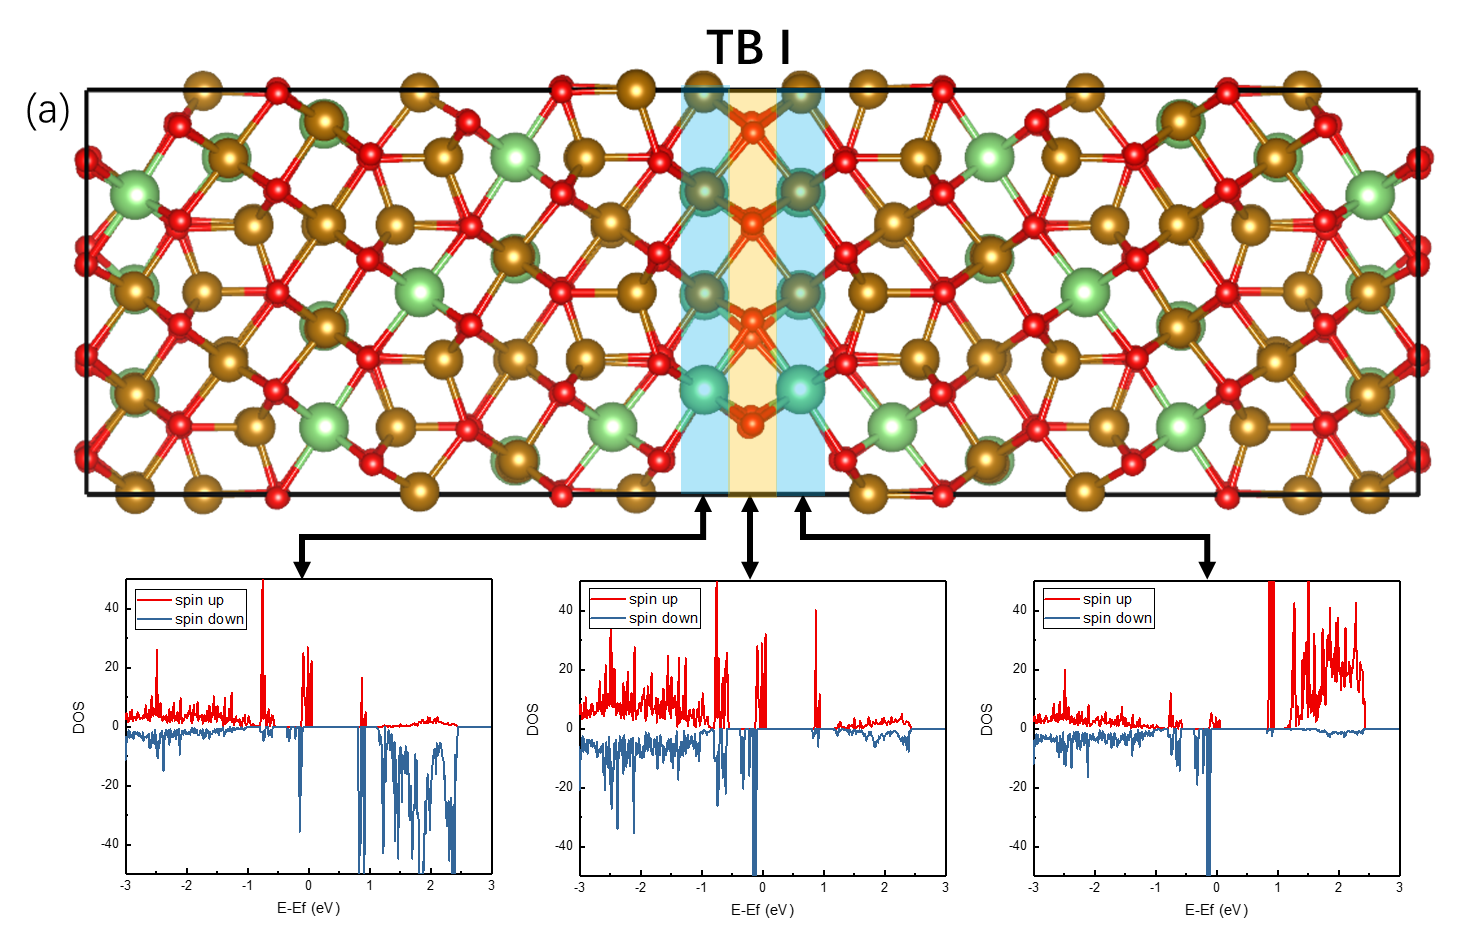 |
| --- |
| 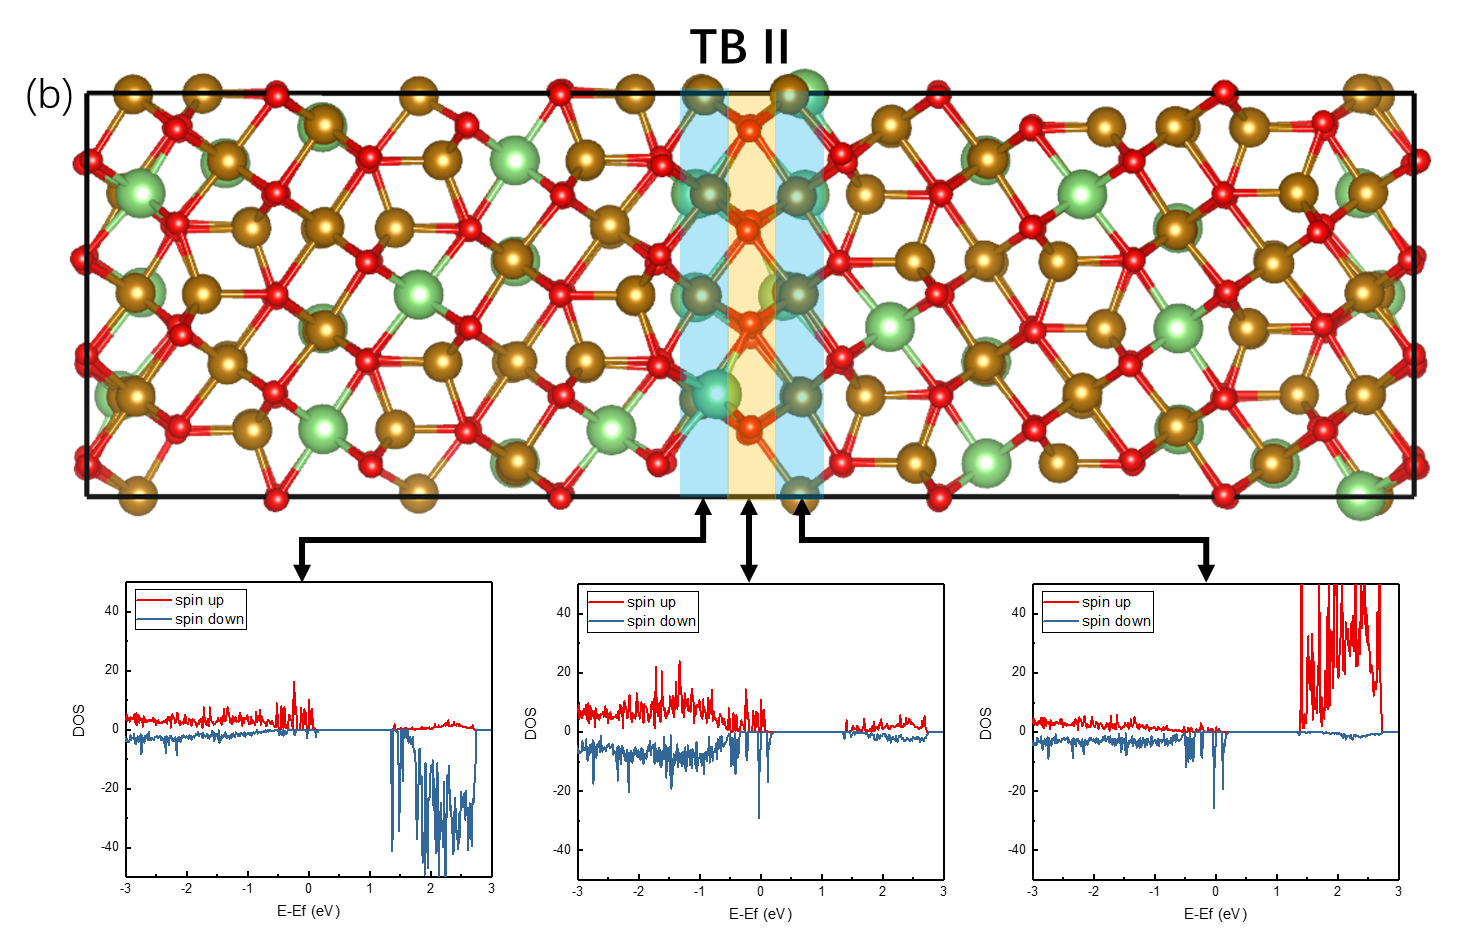 |
| 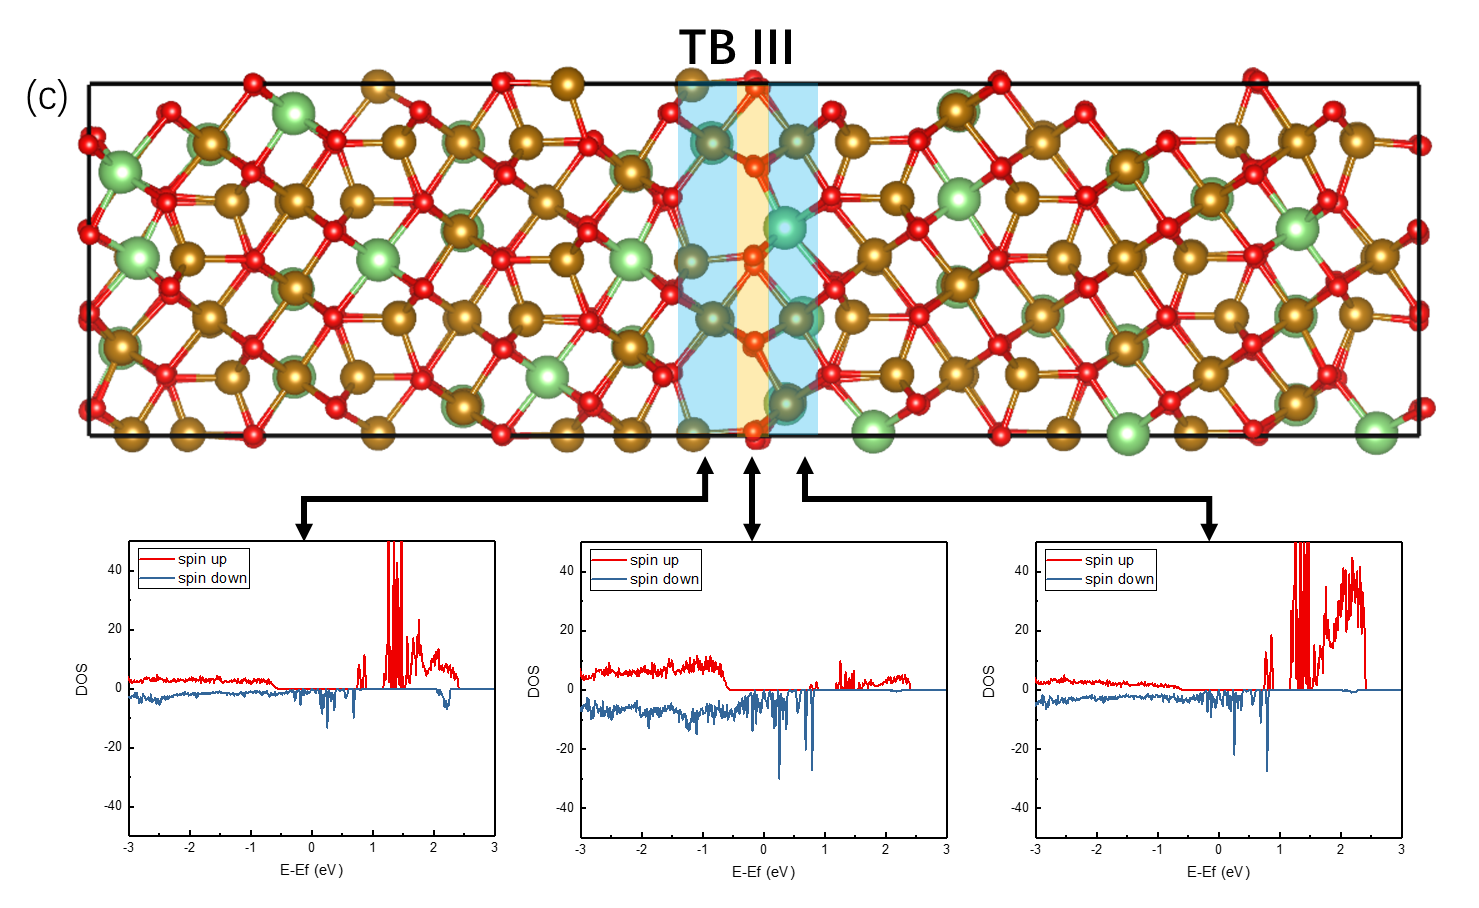 |

**Figure S1.** Spin-polarized DOS directly at the TBs. The spin polarization gradually inverts the direction across the core regions of TB I and TB II in (a) and (b), verifying their AFM coupling. The direction of spin polarization maintains unchanged across the core region of TB III in (c), indicating a FM coupling nature.
